# Supplementary material for: Subdominant Outer Membrane Antigens in Anaplasma marginale: Conservation, Antigenicity, and Protective Capacity Using Recombinant Protein
Source: PubMed Central journal article supplement (PMC4469585; doi:10.1371/journal.pone.0129309), 2015-06-16
Supplement: pone.0129309.s007.pdf [file pone.0129309.s007.pdf]

```

AM854      1  MLHRWLALCFASFVTCGLF---SKEKVGMDIVGVFSS---AGRVEKVFYDFNKYEIK
APH_0338   1  MLRRSSFFCILALLSVTSCGTLLPDSNVGVRHDTGSHRSVAFAKKVEKVFYDFIGKYDLK

AM854      55  GSGKKVLLGLVERMKADKRSTLLIIGHIDSRGTEEYNLALGERRANAVKEFILGCDRSLS
APH_0338   61  GPGKKVILELVEQLRQDSMYLVVIGHADATGTEEYSLALGEKRANAVKOFILGCDKSLA

AM854      115  PRISTQSRGKAEPEVLVYSSDFKEAEKAHAQNRRVLIVECOHSVSPKKMAIKWPFSFG
APH_0338   121  PRVTTQSRGKAEPEVLVYSTDAQEVEKANAQNRRAVIVEFAH-----

AM854      175  RSAAKQDDVGSSEVSDEN-PVDDSSEGIASEEAAPEEGVVSEEAPEEAPEVAQDSSAGVV
APH_0338   180  -----IPRSGVADMEAPVASSITSENSNASAEGEDM---EASEFSSAIAN-----

AM854      234  APE
APH_0338   ---

```

Figure S7. A global pairwise alignment of AM854 and APH\_0338 (OmpA) using lalign. The line above the alignment (AM854 aa19-68) includes the binding domain of APH\_0338 (aa59-74) and denotes the peptide used in the ELISAs. Amino acids that share identity are in white text with a black background. Conservative amino acid replacements are in white text with a gray background.
