# Supplementary material for: Subdominant Outer Membrane Antigens in Anaplasma marginale: Conservation, Antigenicity, and Protective Capacity Using Recombinant Protein
Source: PubMed Central journal article supplement (PMC4469585; doi:10.1371/journal.pone.0129309), 2015-06-16
Supplement: pone.0129309.s008.pdf [file pone.0129309.s008.pdf]

```

AM936      1  M-----SGE DEYKEIIRQCIGSVKEVFGEGRFDDVVASIMKMQEKVLASSM
APH_0248   1  MIPLAPWKSISVVYMSGSD EYKEIIRQCIGSVKEVFGEGRFDDVVASIMKMQEKVLASSM

AM936      47  KDGDP--VGQI-AADGVGNELYDRIADRLEERV SOKISEDLRIIKRILRLERVVLGGGS
APH_0248   61  QDDTGTVGQIESGEGSCARISDEQVQQLMNSIREEFKDDLRAIKRIRLRLERAVYGA--

AM936      104 VSGDAAAHQVSGNQP SQONSSAAAEGG
APH_0248   121 -----NTPKES-----

```

Figure S8. A global pairwise alignment of AM936 and APH\_0248 (Asp14) using lalign. The line above the alignment (AM936 aa84-121) includes the binding domain of APH\_0248 (aa113-124) and denotes the peptide used in the ELISAs. Amino acids that share identity are in white text with a black background. Conservative amino acid replacements are in white text with a gray background.
